# Supplementary material for: Quality of life and metabolic outcomes after total pancreatectomy and simultaneous islet autotransplantation
Source: PubMed Central journal article supplement (PMC9053265; doi:10.1038/s43856-022-00087-7), 2022-03-03
Supplement: 43856_2022_87_MOESM4_ESM.pdf [file 43856_2022_87_MOESM4_ESM.pdf]

## **Description of Additional Supplementary Files**

**File Name:** Supplementary Data 1

**Description:** The datasets generated during and/or analysed during the current study
